# Supplementary material
Source: publisher site journal article supplement (https://www.dovepress.com/article/267428)
Supplement: Supplementary file 1 [file get_supplementary_file.php]

**Supplementary data**

**Table S1**. Dressing agents used

| **Agent** | **No. of patients n (%)** |
| --- | --- |
| 1. Nano crystalline silver gel  2. EUSOL solution  3. Negative pressure wound dressings  4. Papain-urea ointment  5. Povidone-Iodine ointment  6. Sucralfate + Povidone-Iodine + Metronidazole ointment  7. Vinegar  8. Mupirocin + Metronidazole impregnated collagen granules | 57 (55.33)  18 (17.47)  7 (6.7)  7 (6.7)  6 (4.8)  4 (3.8)  2 (1.9)  2 (1.9) |

**Abbreviations:** EUSOL,Edinburgh University Solution of Lime
